# Supplementary material for: Phylogenetic analysis of a new morphological dataset elucidates the evolutionary history of Crocodylia and resolves the long-standing gharial problem
Source: PeerJ journal article supplement (doi:10.7717/peerj.12094), 2021-09-06
Supplement: Document_S1.pdf [file Document_S1.pdf]

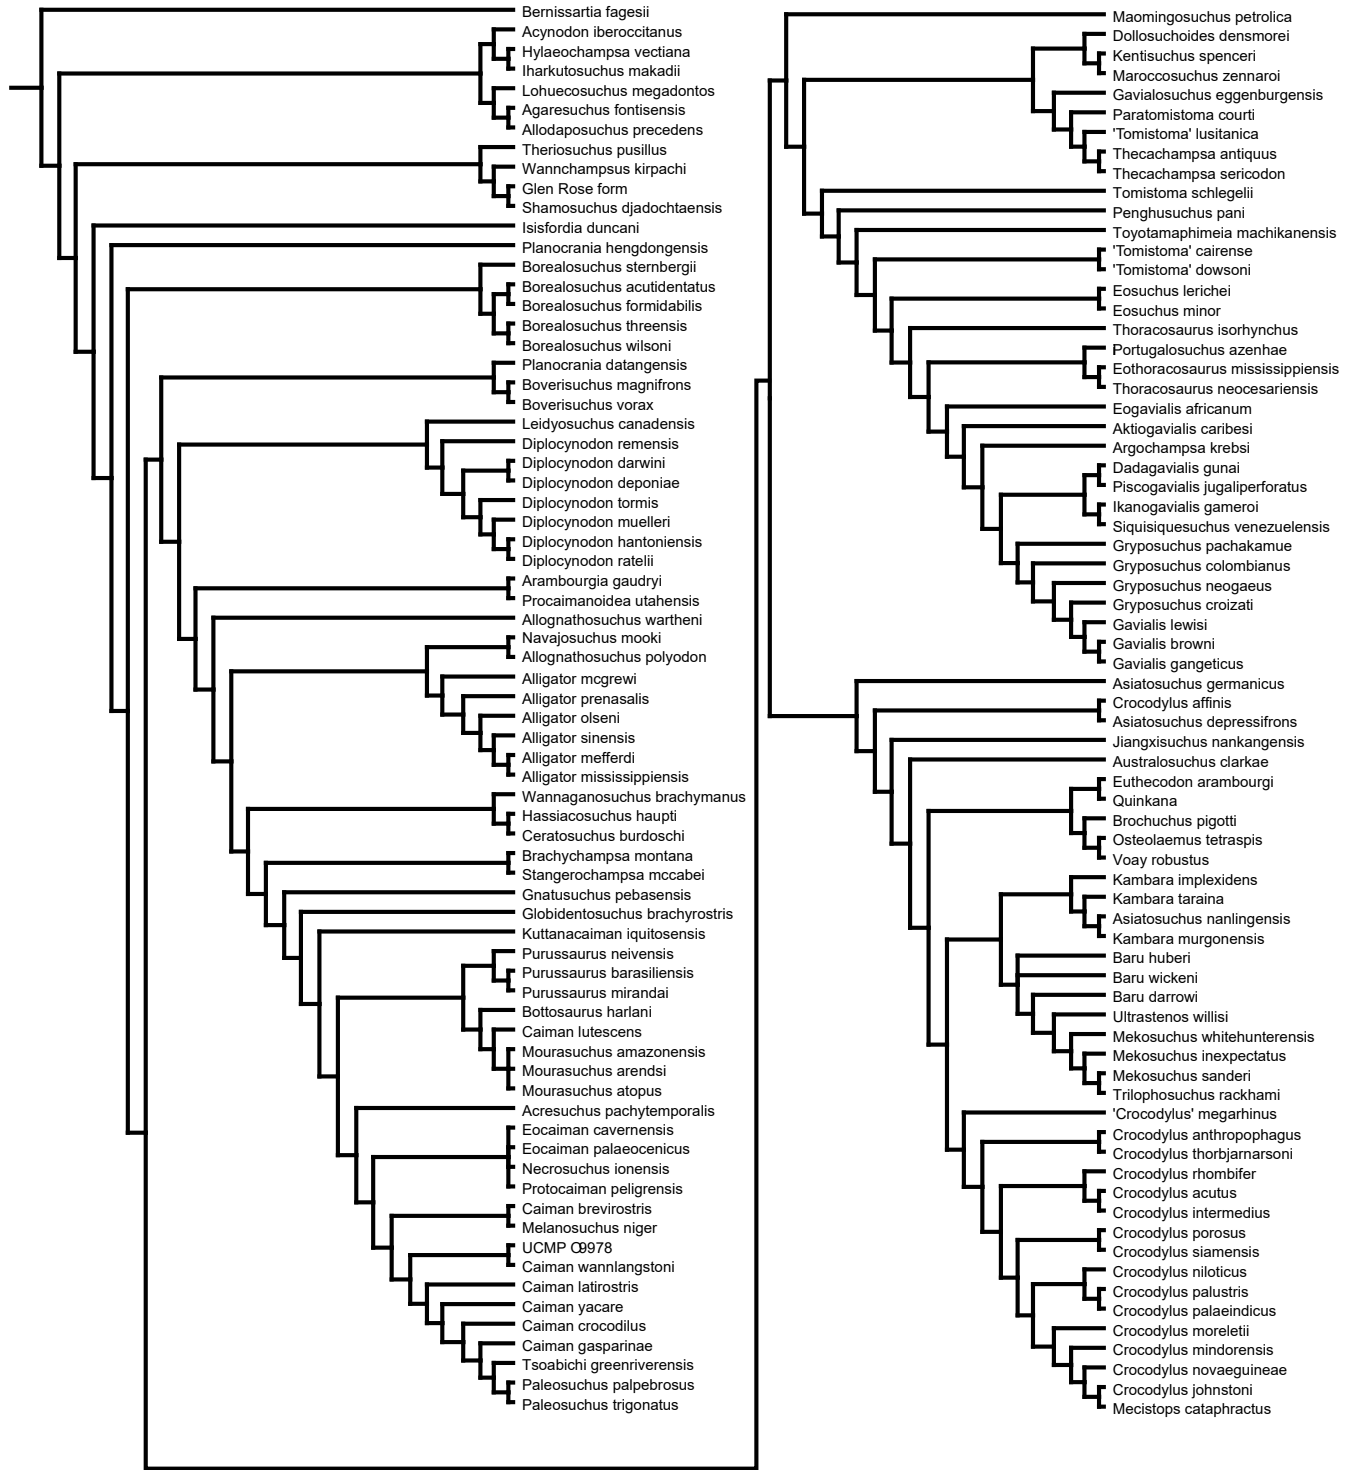

Figure 1: Strict consensus of 6 MPTs from Analysis 1.1

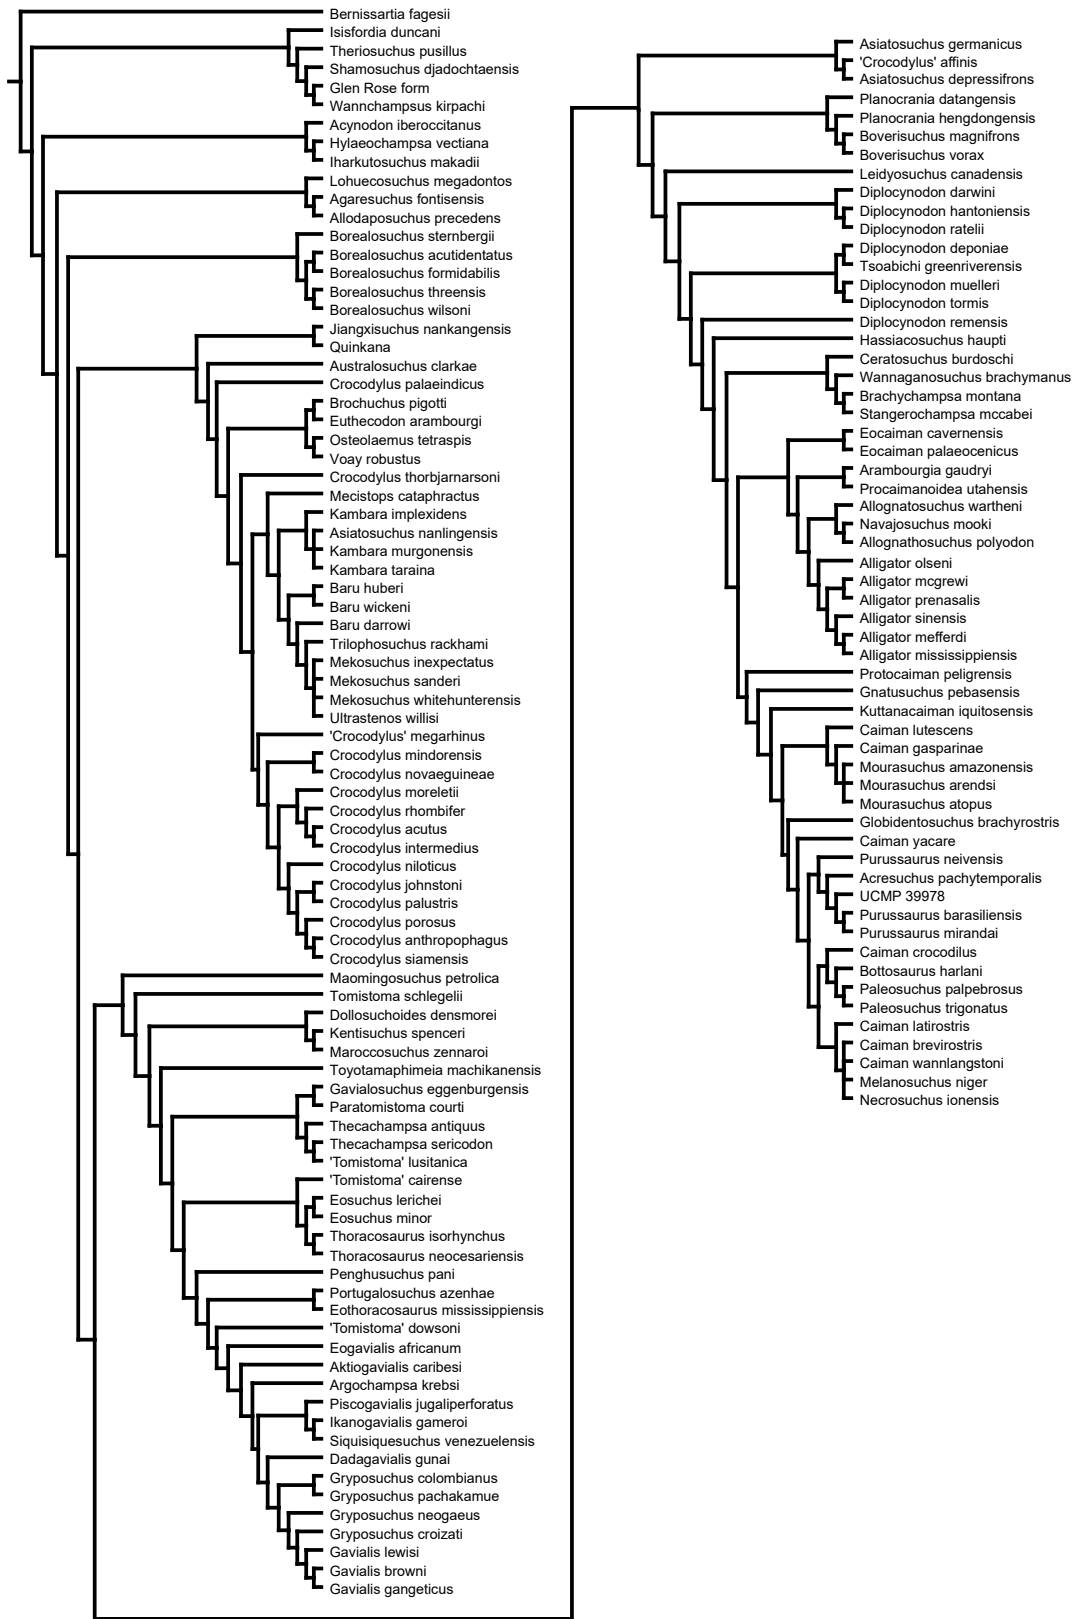

Figure 2: Strict consensus of 9 MPTs from Analysis 1.2

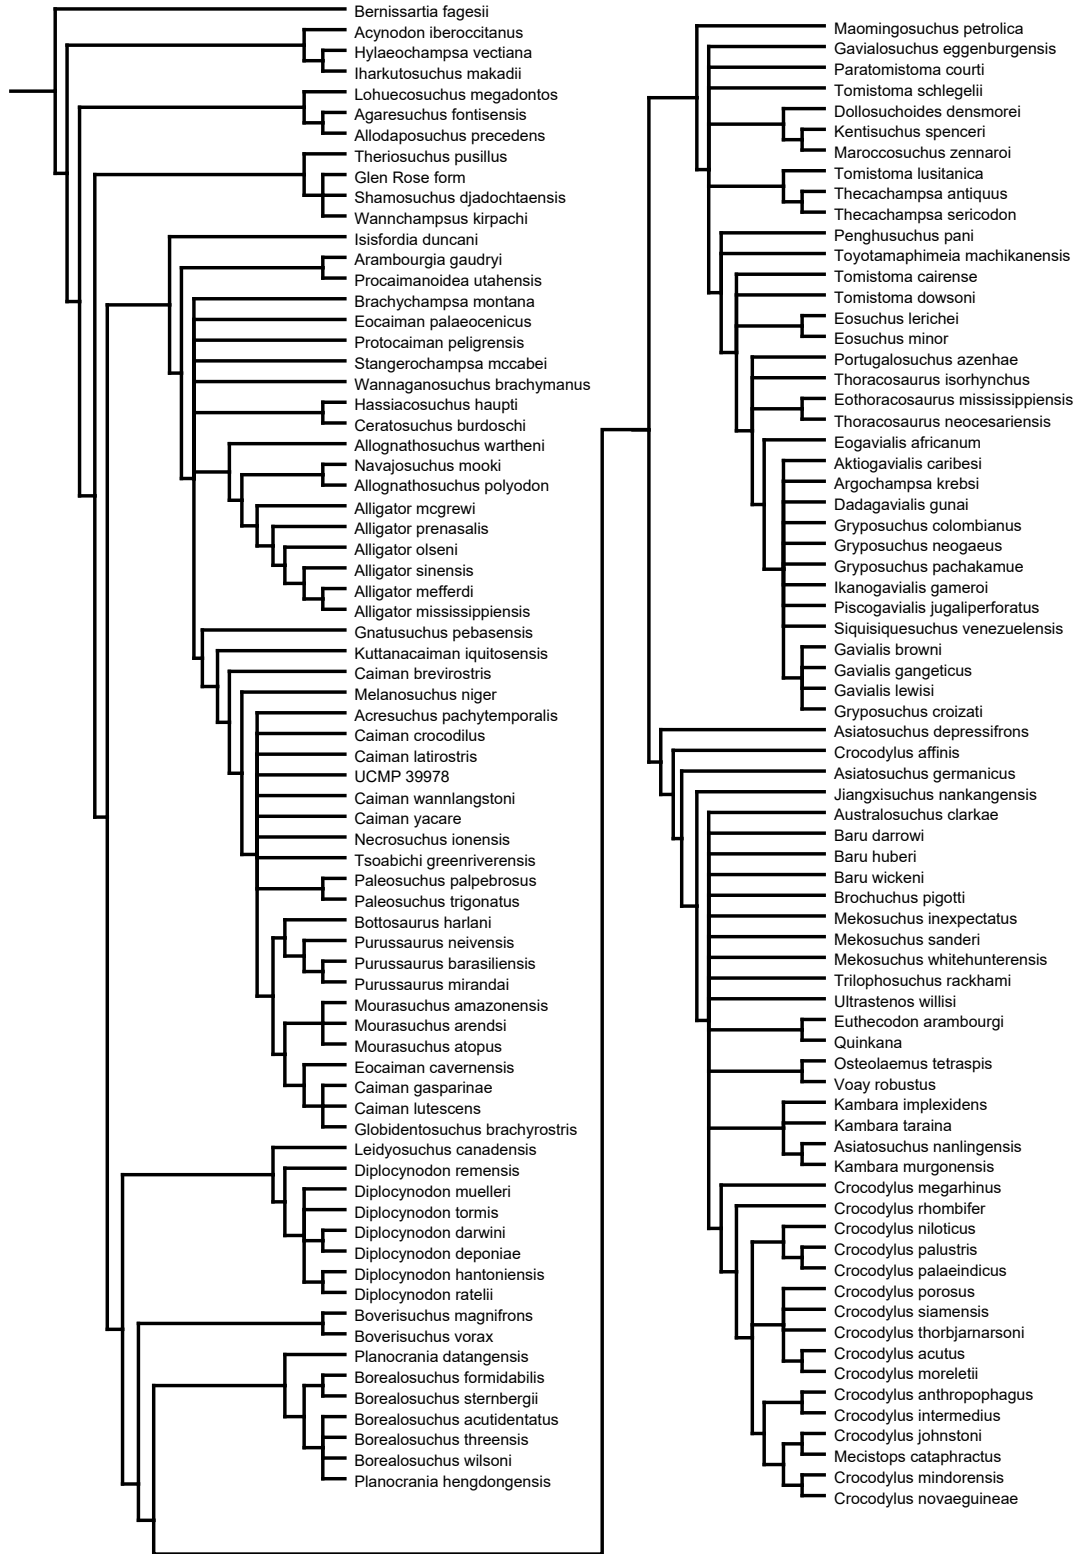

Figure 3: Strict consensus of 400,000 MPTs from Analysis 2.1

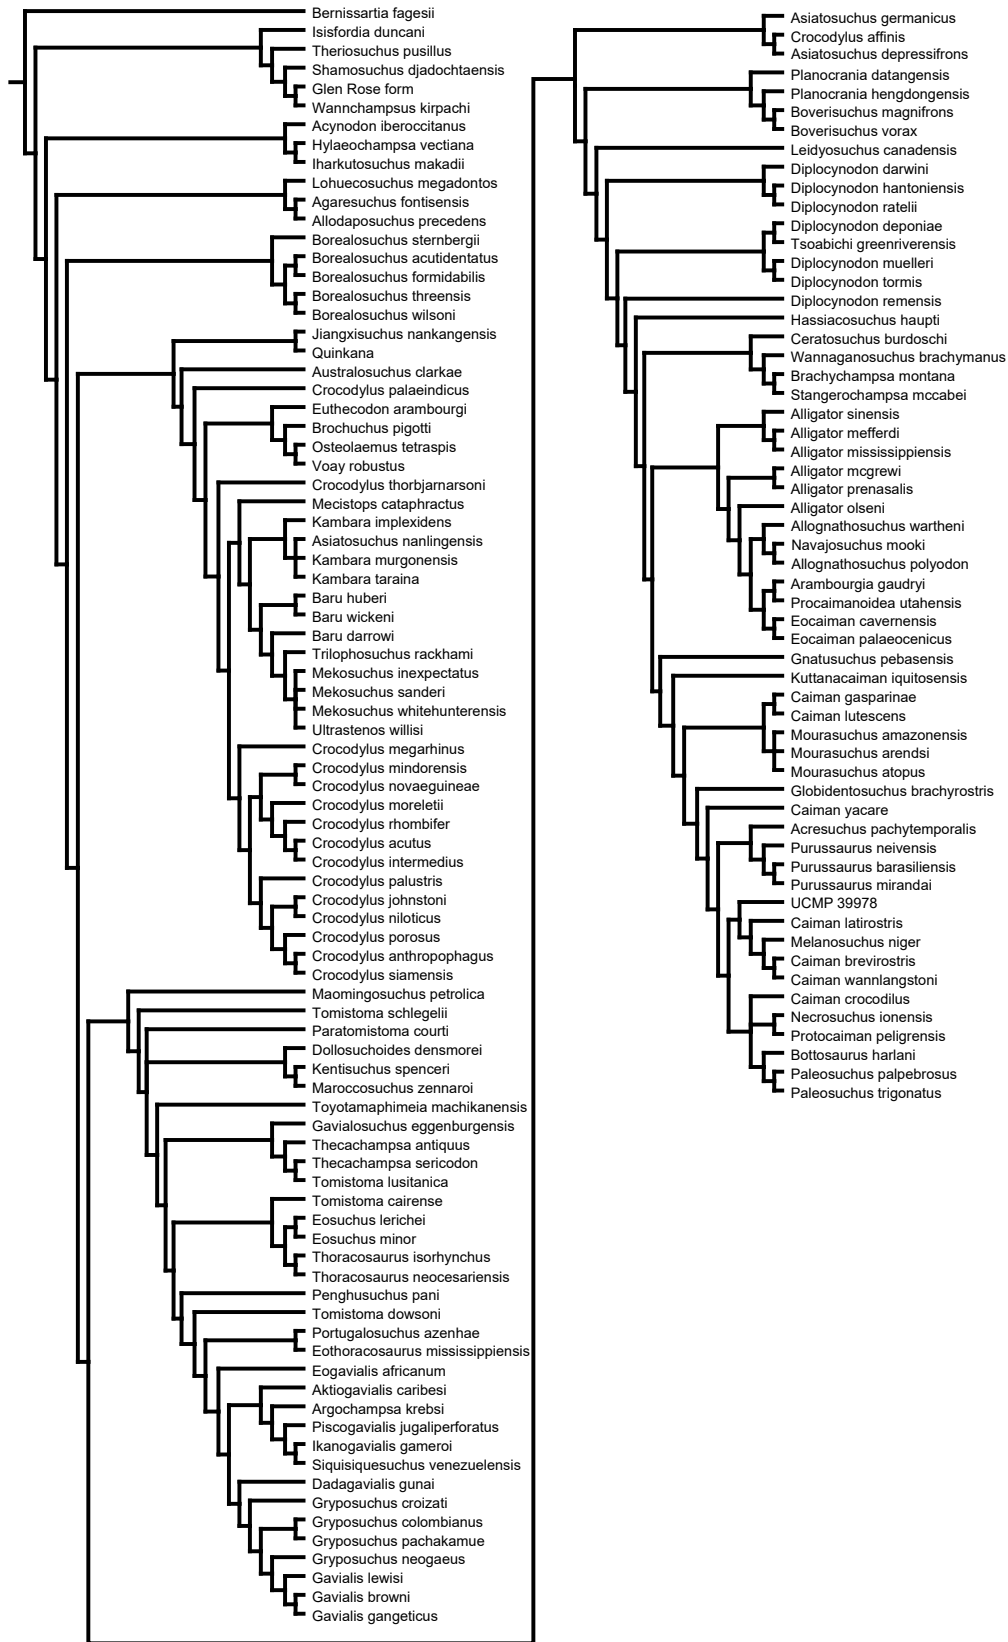

Figure 4: Strict consensus of 3 MPTs from Analysis 2.2

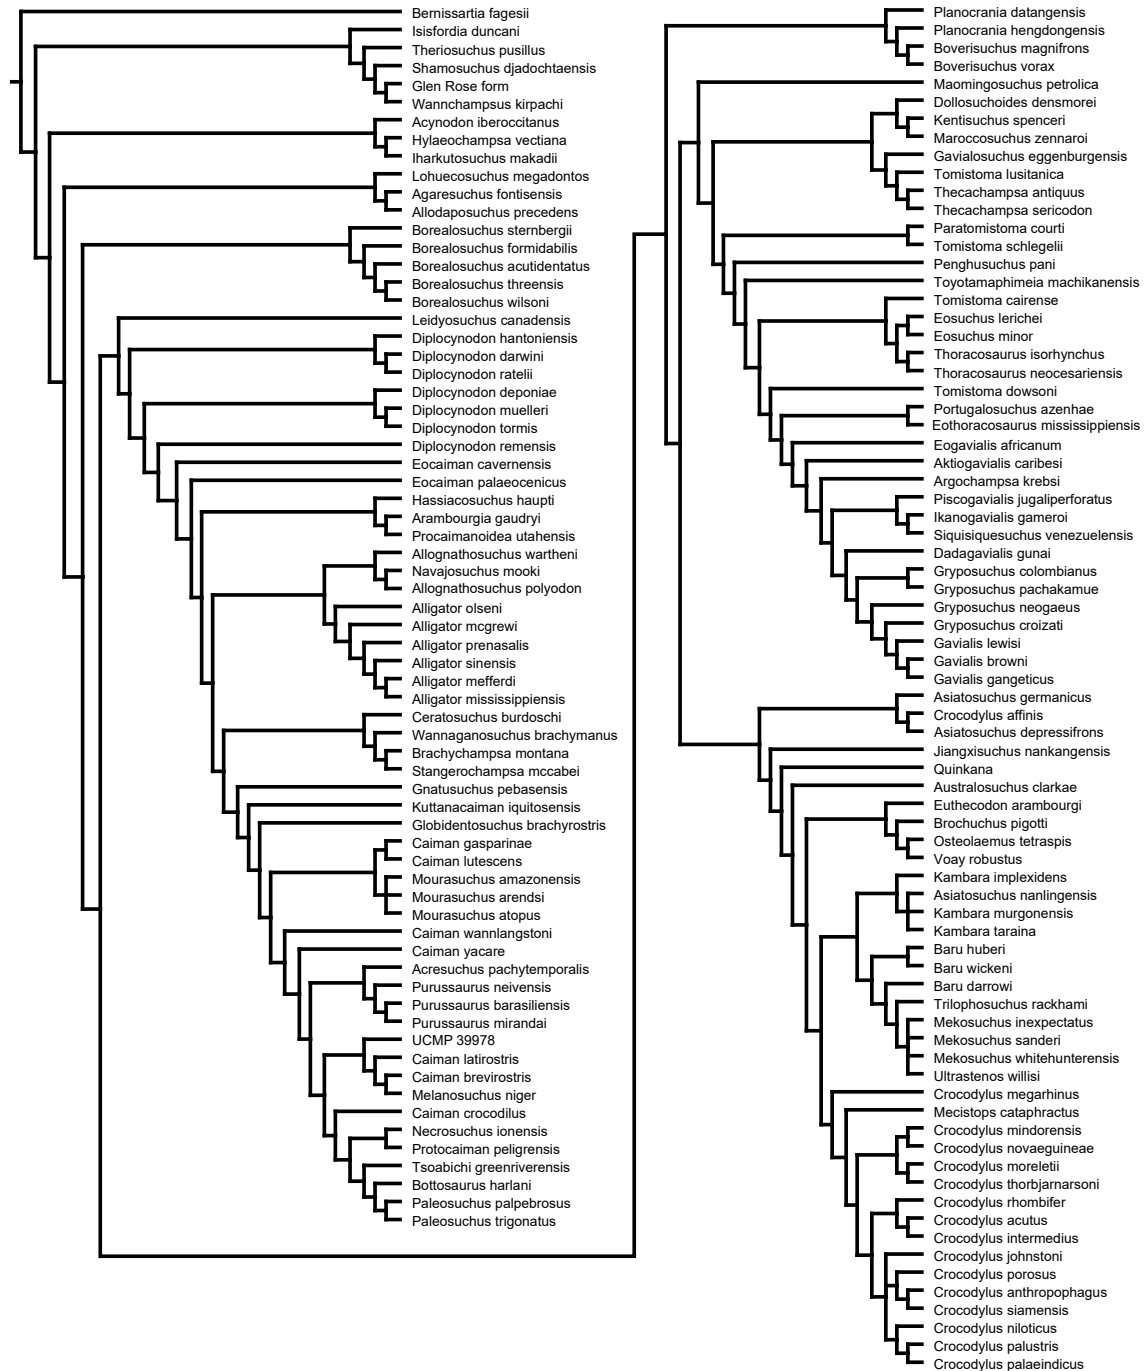

Figure 5: Strict consensus of 3 MPTs from Analysis 2.3

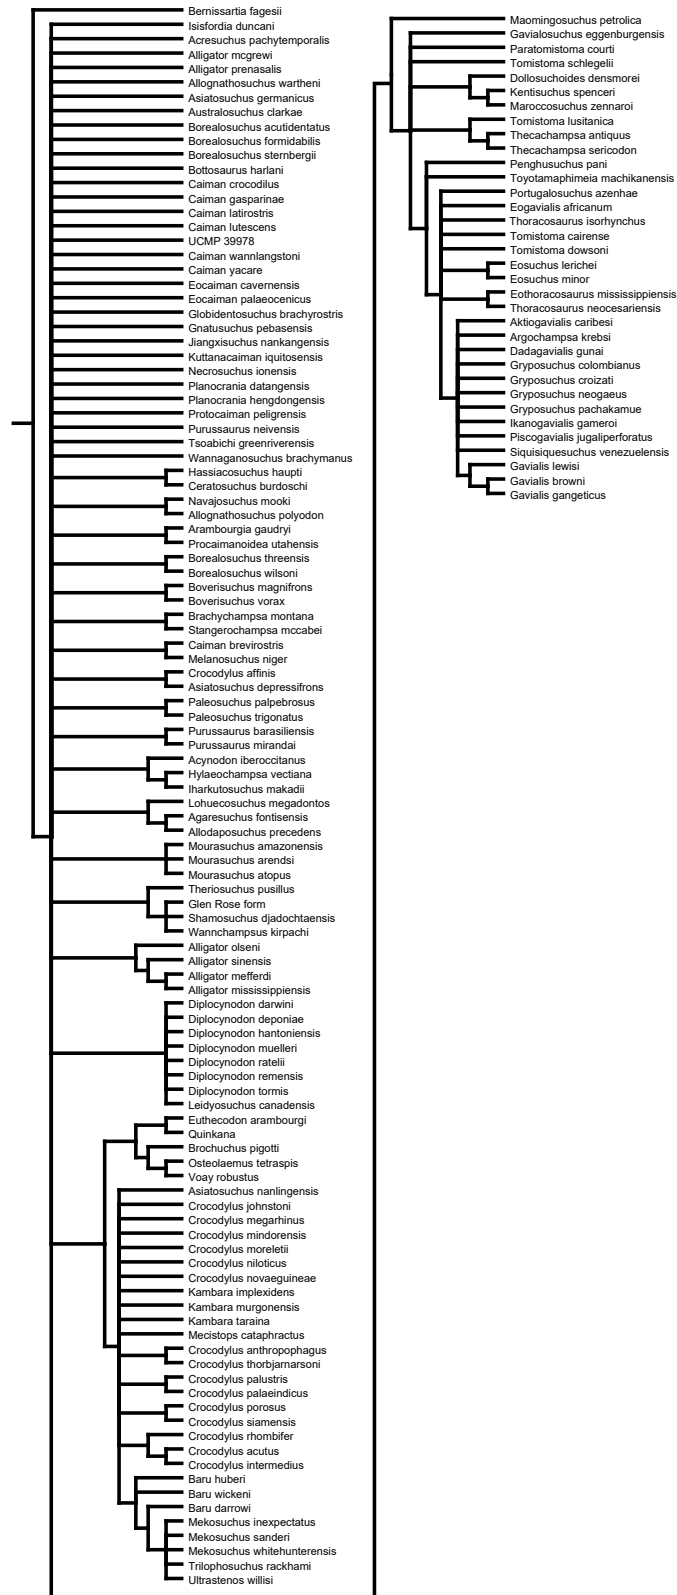

Figure 6: Strict consensus of 400,000 MPTs from Analysis 3.1

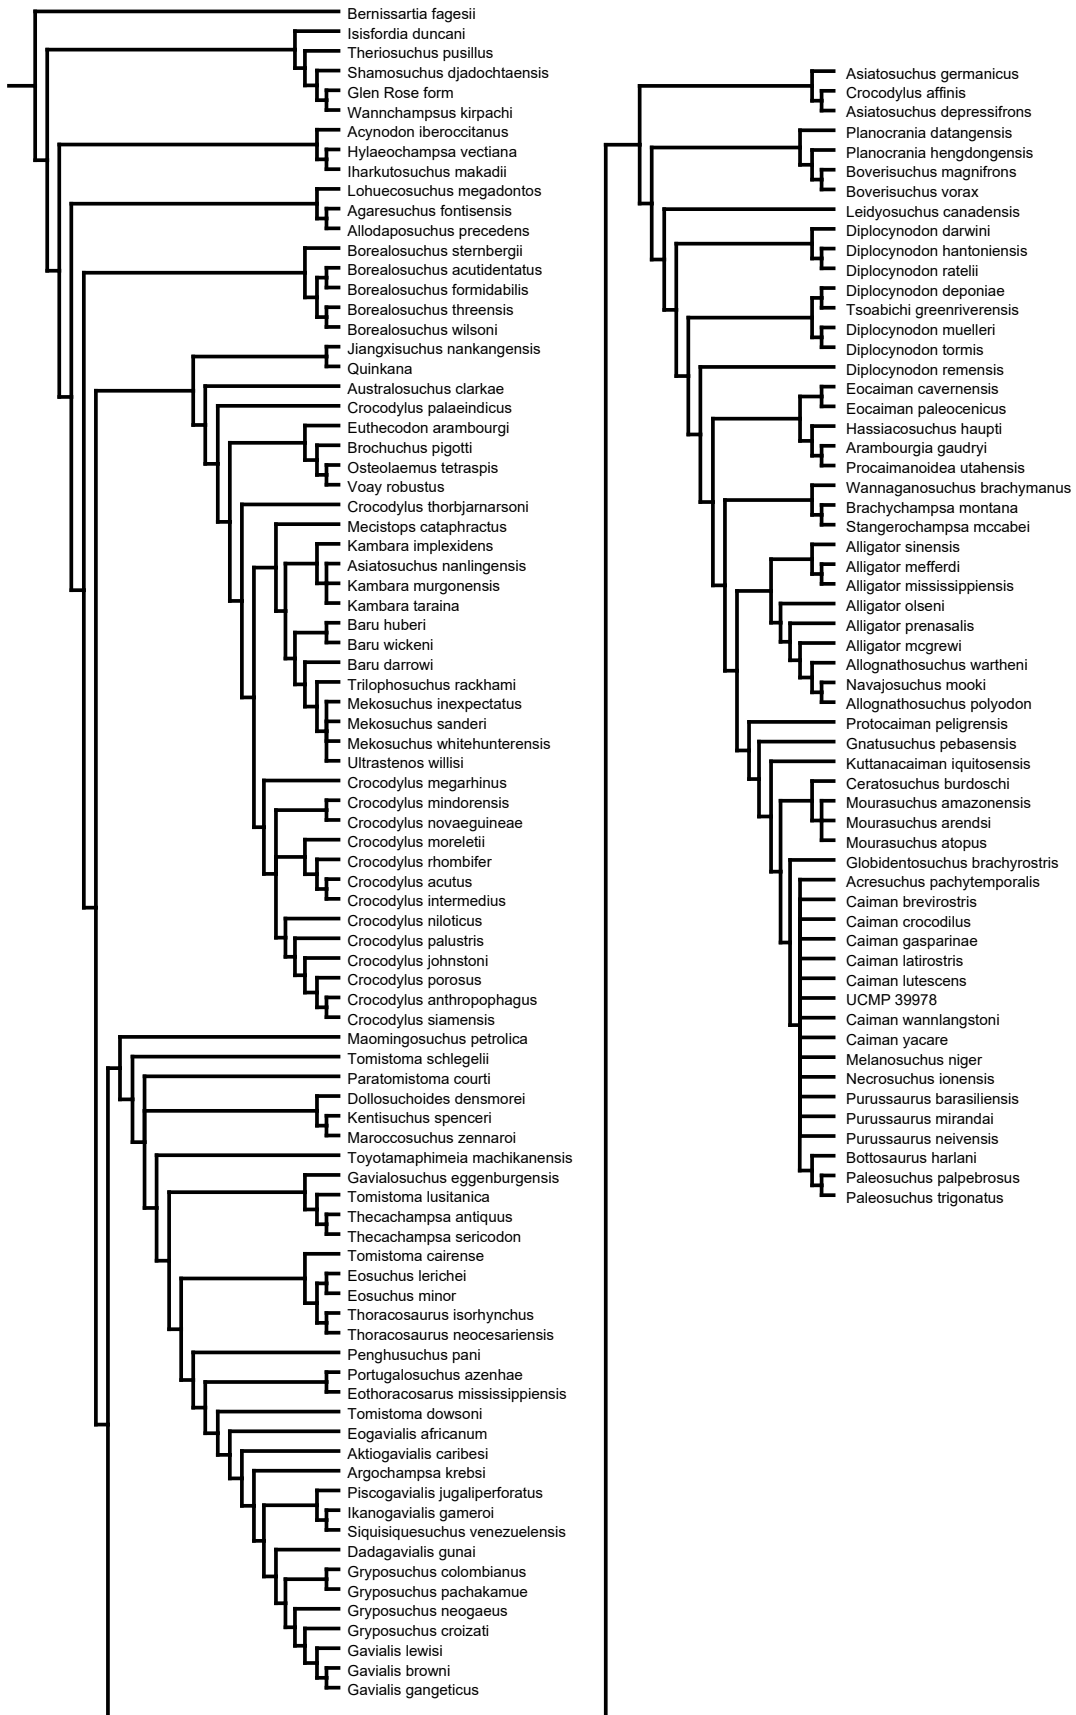

Figure 7: Strict consensus of 69 MPTs from Analysis 3.2

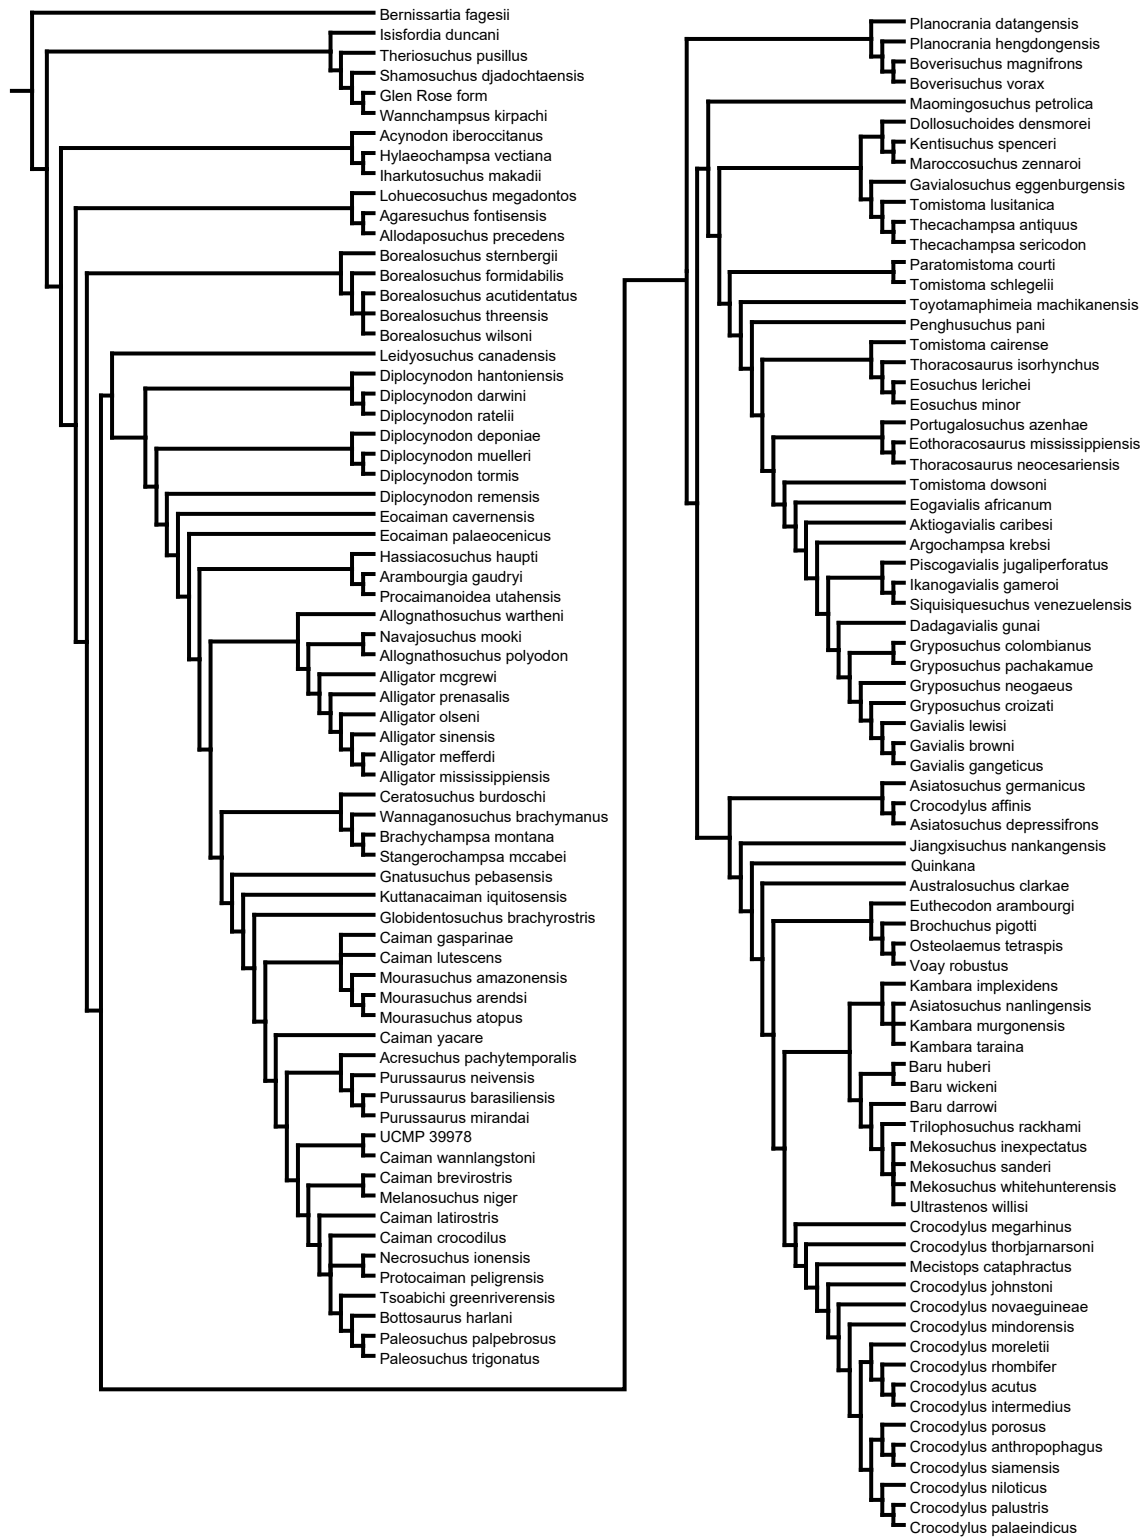

Figure 8: Strict consensus of 3 MPTs from Analysis 3.3
