# Supplementary material for: Phylogenetic analysis of a new morphological dataset elucidates the evolutionary history of Crocodylia and resolves the long-standing gharial problem
Source: PeerJ journal article supplement (doi:10.7717/peerj.12094), 2021-09-06

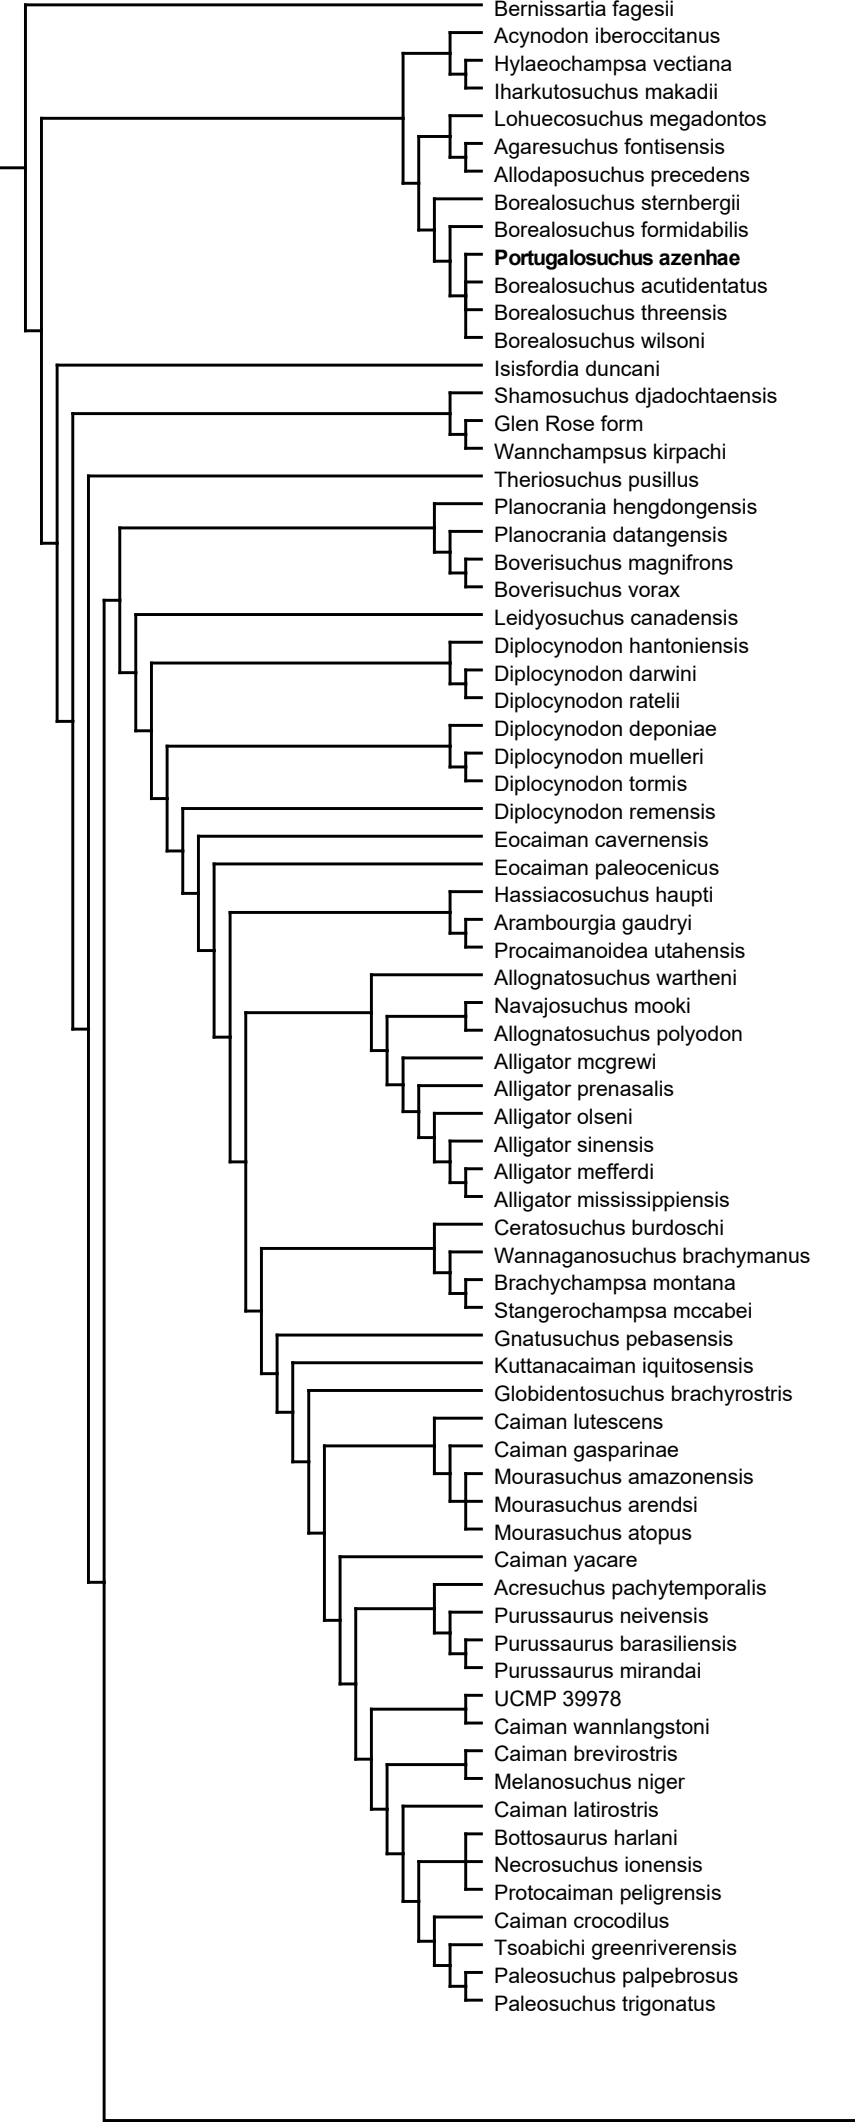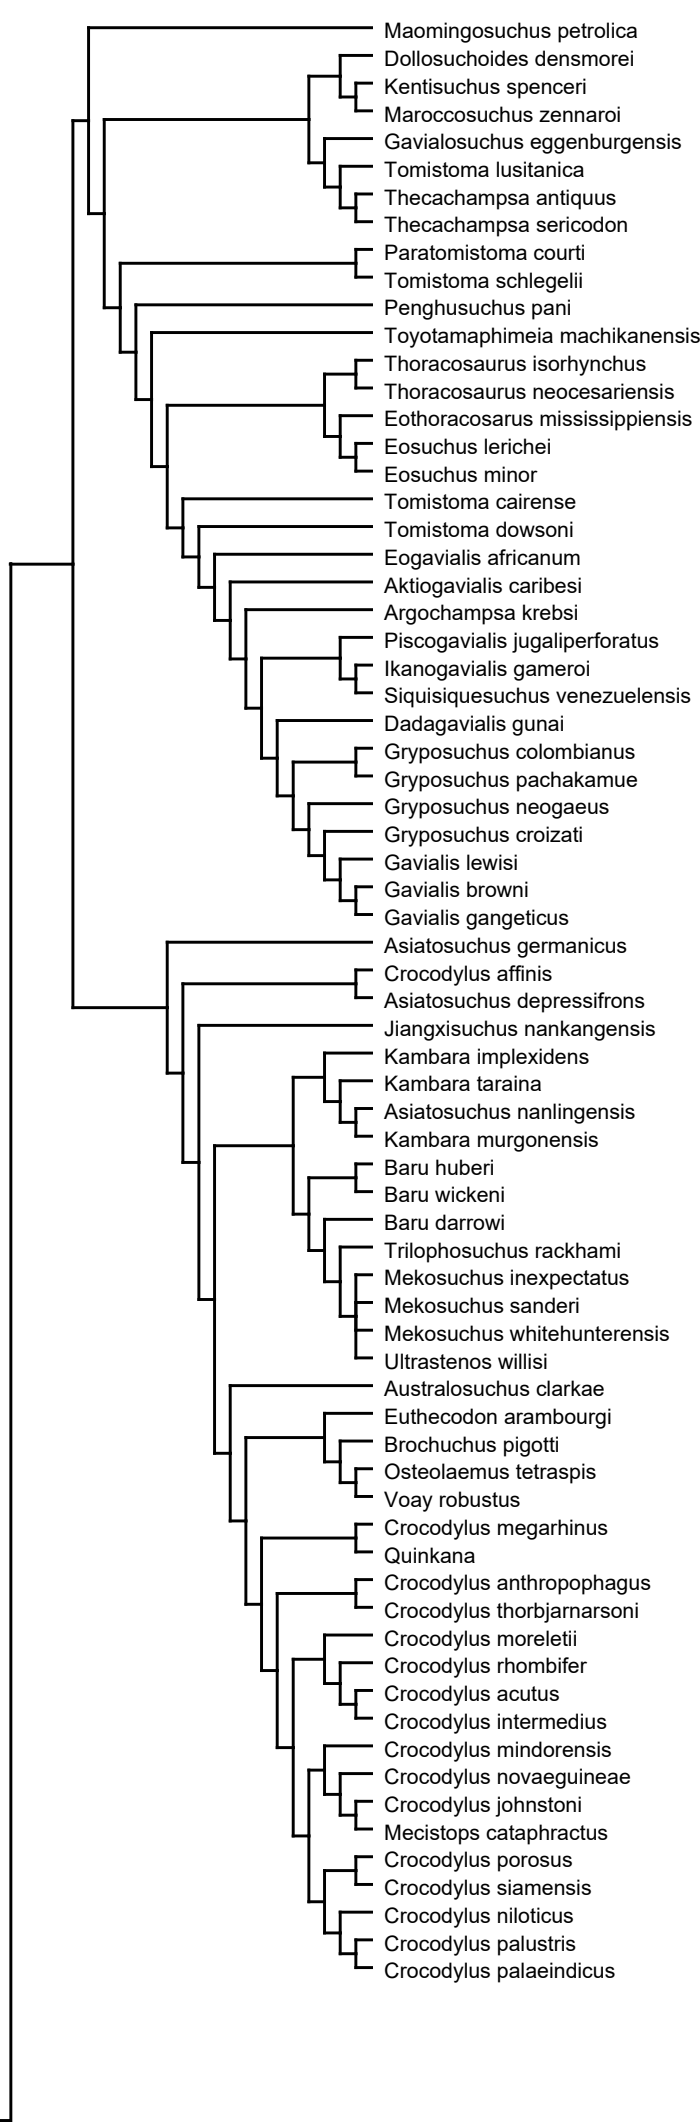

Supplement: FigureS9.pdf [file FigureS9.pdf]
