# Supplementary material for: Phylogenetic analysis of a new morphological dataset elucidates the evolutionary history of Crocodylia and resolves the long-standing gharial problem
Source: PeerJ journal article supplement (doi:10.7717/peerj.12094), 2021-09-06
Supplement: Supp_File_4_Character_CI.pdf [file Supp_File_4_Character_CI.pdf]

## Character CI values

|            |            |             |             |
|------------|------------|-------------|-------------|
| 1. 0.0979  | 45. 1      | 89. 0.1429  | 133. 0.5    |
| 2. 0.3422  | 46. 0.0909 | 90. 0.1667  | 134. 0.1667 |
| 3. 0.1562  | 47. 0.25   | 91. 0.3333  | 135. 0.1429 |
| 4. 0.1645  | 48. 0.3333 | 92. 0.1667  | 136. 0.1667 |
| 5. 0.0874  | 49. 0.0909 | 93. 0.1111  | 137. 0.3333 |
| 6. 0.0425  | 50. 0.0833 | 94. 0.15    | 138. 0.1111 |
| 7. 0.1374  | 51. 0.5    | 95. 0.25    | 139. 0.0714 |
| 8. 0.0438  | 52. 0.1667 | 96. 0.0769  | 140. 0.5    |
| 9. 0.0236  | 53. 0.1    | 97. 0.25    | 141. 0.1304 |
| 10. 0.0824 | 54. 0.0476 | 98. 0.1667  | 142. 0.1316 |
| 11. 0.0909 | 55. 0.1429 | 99. 0.1     | 143. 0.3333 |
| 12. 0.0578 | 56. 0.1667 | 100. 0.2    | 144. 0.1667 |
| 13. 0.0498 | 57. 0.0833 | 101. 1      | 145. 0.05   |
| 14. 0.0116 | 58. 0.0571 | 102. 0.1667 | 146. 0.1    |
| 15. 0.2266 | 59. 0.3333 | 103. 0.25   | 147. 0.5833 |
| 16. 0.1544 | 60. 0.0909 | 104. 0.5    | 148. 0.1111 |
| 17. 0.0404 | 61. 0.1111 | 105. 0.1429 | 149. 0.2    |
| 18. 0.3049 | 62. 0.1429 | 106. 0.1667 | 150. 0.125  |
| 19. 0.0649 | 63. 0.05   | 107. 0.1667 | 151. 0.1667 |
| 20. 0.1693 | 64. 0.5    | 108. 0.1    | 152. 0.1667 |
| 21. 0.0976 | 65. 1      | 109. 0.1538 | 153. 0.5    |
| 22. 0.0889 | 66. 1      | 110. 0.2222 | 154. 0.0556 |
| 23. 0.0947 | 67. 0.25   | 111. 1      | 155. 0.3333 |
| 24. 0.2022 | 68. 1      | 112. 0.3333 | 156. 0.2    |
| 25. 0.1237 | 69. 0.3333 | 113. 0.5    | 157. 1      |
| 26. 0.1212 | 70. 0.1    | 114. 0.125  | 158. 0.3333 |
| 27. 0.3333 | 71. 0.5    | 115. 0.0714 | 159. 0.3333 |
| 28. 0.3333 | 72. 0.087  | 116. 1      | 160. 0.1    |
| 29. 1      | 73. 0.0667 | 117. 0.3333 | 161. 0.125  |
| 30. 0.0833 | 74. 0.0455 | 118. 0.1667 | 162. 0.1    |
| 31. 0.0769 | 75. 0.0625 | 119. 0.1765 | 163. 0.0667 |
| 32. 0.1667 | 76. 0.0345 | 120. 1      | 164. 0.1667 |
| 33. 0.1429 | 77. 0.1111 | 121. 0.125  | 165. 0.5    |
| 34. 0.5    | 78. 0.1333 | 122. 1      | 166. 0.125  |
| 35. 1      | 79. 0.0588 | 123. 0.2    | 167. 0.0833 |
| 36. 1      | 80. 0.3333 | 124. 0.1    | 168. 0.1429 |
| 37. 0.1429 | 81. 0.3333 | 125. 1      | 169. 0.125  |
| 38. 0.1667 | 82. 0.1667 | 126. 0.2    | 170. 1      |
| 39. 1      | 83. 0.2    | 127. 0.25   | 171. 0.1111 |
| 40. 1      | 84. 0.3333 | 128. 0.3333 | 172. 0.2    |
| 41. 0.0588 | 85. 0.5    | 129. 0.25   | 173. 0.0588 |
| 42. 0.5    | 86. 1      | 130. 0.0909 | 174. 0.0667 |
| 43. 0.5    | 87. 0.2    | 131. 0.25   | 175. 0.0769 |
| 44. 0.1429 | 88. 0.4    | 132. 0.2    | 176. 0.3333 |

|             |             |             |             |
|-------------|-------------|-------------|-------------|
| 177. 0.3333 | 216. 0.2    | 255. 0.5    | 294. 0.5    |
| 178. 1      | 217. 0.2    | 256. 0.3333 | 295. 1      |
| 179. 0.3333 | 218. 0.3333 | 257. 0.25   | 296. 0.3333 |
| 180. 0.2    | 219. 0.3077 | 258. 0.1429 | 297. 0.2857 |
| 181. 0.1    | 220. 0.2222 | 259. 0.5    | 298. 1      |
| 182. 1      | 221. 0.1379 | 260. 1      | 299. 0.2    |
| 183. 0.125  | 222. 0.0909 | 261. 0.1667 | 300. 0.5    |
| 184. 0.0833 | 223. 1      | 262. 0.3333 | 301. 0.1667 |
| 185. 0.25   | 224. 0.3    | 263. 0.5    | 302. 0.1429 |
| 186. 0.5    | 225. 0.3333 | 264. 0.2    | 303. 0.5    |
| 187. 1      | 226. 0.0909 | 265. 0.25   | 304. 0.5    |
| 188. 0.6667 | 227. 0.25   | 266. 0.5    | 305. 0.5    |
| 189. 0.2    | 228. 1      | 267. 0.2    | 306. 0.3333 |
| 190. 0.2727 | 229. 0.0769 | 268. 0.5    | 307. 0.0909 |
| 191. 0.0833 | 230. 0.6667 | 269. 1      | 308. 0.1538 |
| 192. 0.1667 | 231. 1      | 270. 0.5    | 309. 0.1    |
| 193. 0.0833 | 232. 1      | 271. 0.5    | 310. 1      |
| 194. 0.2    | 233. 1      | 272. 0.5    | 311. 0.25   |
| 195. 0.375  | 234. 0.5    | 273. 0.0714 | 312. 0.5    |
| 196. 0.2    | 235. 0.1818 | 274. 0.0909 | 313. 1      |
| 197. 0.0667 | 236. 0.1429 | 275. 0.1667 | 314. 1      |
| 198. 1      | 237. 0.1    | 276. 0.3333 | 315. 1      |
| 199. 1      | 238. 0.3333 | 277. 0.1429 | 316. 0.2    |
| 200. 0.5    | 239. 0.1429 | 278. 0.5    | 317. 1      |
| 201. 0.25   | 240. 0.0909 | 279. 0.5    | 318. 0.3333 |
| 202. 0.25   | 241. 0.1429 | 280. 0.1667 | 319. 0.5    |
| 203. 0.25   | 242. 0.125  | 281. 100    | 320. 1      |
| 204. 0.3333 | 243. 0.125  | 282. 0.3333 | 321. 0.2    |
| 205. 0.25   | 244. 0.0909 | 283. 1      | 322. 0.25   |
| 206. 0.25   | 245. 0.1    | 284. 0.2857 | 323. 0.4    |
| 207. 0.3333 | 246. 0.1429 | 285. 0.5    | 324. 0.3636 |
| 208. 0.5    | 247. 0.1111 | 286. 1      | 325. 0.25   |
| 209. 0.3    | 248. 0.25   | 287. 1      | 326. 0.1    |
| 210. 0.5    | 249. 0.125  | 288. 1      | 327. 0.1111 |
| 211. 0.2    | 250. 0.5    | 289. 0.1667 | 328. 0.25   |
| 212. 0.25   | 251. 0.0769 | 290. 1      | 329. 0.3333 |
| 213. 1      | 252. 0.25   | 291. 1      | 330. 0.5    |
| 214. 0.1333 | 253. 0.0833 | 292. 1      |             |
| 215. 0.1429 | 254. 0.2    | 293. 0.6667 |             |
