# Supplementary material for: Phylogenetic analysis of a new morphological dataset elucidates the evolutionary history of Crocodylia and resolves the long-standing gharial problem
Source: PeerJ. 2021 Sep 6;9:e12094. doi: 10.7717/peerj.12094 (PMC8428266; doi:10.7717/peerj.12094)
Supplement: Supplemental Information 17 [file peerj-09-12094-s017.pdf]

Table 1: Rejected characters

| Study              | Character | Reason for rejection                     |
|--------------------|-----------|------------------------------------------|
| Groh et al. (2020) | 2         | not applicable to this dataset           |
| Groh et al. (2020) | 6         | not applicable to this dataset           |
| Groh et al. (2020) | 7         | not applicable to this dataset           |
| Groh et al. (2020) | 8         | similar to character 5 in this dataset   |
| Groh et al. (2020) | 9         | not applicable to this dataset           |
| Groh et al. (2020) | 10        | similar to character 141 in this dataset |
| Groh et al. (2020) | 11        | not applicable to this dataset           |
| Groh et al. (2020) | 14        | continuous character not measured        |
| Groh et al. (2020) | 15        | not applicable to this dataset           |
| Groh et al. (2020) | 17        | similar to character 53 in this dataset  |
| Groh et al. (2020) | 18        | similar to character 58 in this dataset  |
| Groh et al. (2020) | 19        | not applicable to this dataset           |
| Groh et al. (2020) | 20        | not applicable to this dataset           |
| Groh et al. (2020) | 21        | similar to character 6 in this dataset   |
| Groh et al. (2020) | 22        | similar to character 61 in this dataset  |
| Groh et al. (2020) | 23        | similar to character 62 in this dataset  |
| Groh et al. (2020) | 24        | similar to character 6 in this dataset   |
| Groh et al. (2020) | 25        | similar to character 6 in this dataset   |
| Groh et al. (2020) | 29        | not applicable to this dataset           |
| Groh et al. (2020) | 32        | similar to character 6 in this dataset   |
| Groh et al. (2020) | 36        | similar to character 183 in this dataset |
| Groh et al. (2020) | 37        | similar to character 1 in this dataset   |
| Groh et al. (2020) | 40        | similar to character 10 in this dataset  |
| Groh et al. (2020) | 43        | similar to character 2 in this dataset   |
| Groh et al. (2020) | 44        | similar to character 8 in this dataset   |
| Groh et al. (2020) | 45        | similar to character 8 in this dataset   |
| Groh et al. (2020) | 48        | similar to character 14 in this dataset  |
| Groh et al. (2020) | 49        | not applicable to this dataset           |
| Groh et al. (2020) | 50        | not applicable to this dataset           |
| Groh et al. (2020) | 51        | not applicable to this dataset           |
| Groh et al. (2020) | 53        | similar to character 218 in this dataset |
| Groh et al. (2020) | 54        | similar to character 220 in this dataset |
| Groh et al. (2020) | 57        | similar to character 262 in this dataset |
| Groh et al. (2020) | 58        | not applicable to this dataset           |
| Groh et al. (2020) | 59        | similar to character 266 in this dataset |
| Groh et al. (2020) | 60        | similar to character 277 in this dataset |
| Groh et al. (2020) | 62        | similar to character 275 in this dataset |
| Groh et al. (2020) | 63        | not applicable to this dataset           |
| Groh et al. (2020) | 64        | similar to character 280 in this dataset |
| Groh et al. (2020) | 65        | not applicable to this dataset           |
| Groh et al. (2020) | 66        | not applicable to this dataset           |
| Groh et al. (2020) | 67        | similar to character 301 in this dataset |

Table 1: Rejected characters

| Study                        | Character | Reason for rejection                                              |
|------------------------------|-----------|-------------------------------------------------------------------|
| Groh et al. (2020)           | 70        | not applicable to this dataset                                    |
| Groh et al. (2020)           | 71        | continuous character not measured                                 |
| Groh et al. (2020)           | 72        | continuous character not measured                                 |
| Groh et al. (2020)           | 73        | continuous character not measured                                 |
| Groh et al. (2020)           | 74        | continuous character not measured                                 |
| Groh et al. (2020)           | 75        | continuous character not measured                                 |
| Groh et al. (2020)           | 76        | considered impractical to measure                                 |
| Groh et al. (2020)           | 77        | not applicable to this dataset                                    |
| Groh et al. (2020)           | 78        | considered impractical to measure                                 |
| Groh et al. (2020)           | 79        | continuous character not measured                                 |
| Groh et al. (2020)           | 81        | continuous character not measured                                 |
| Groh et al. (2020)           | 107       | invalid character considered artefact of preservation             |
| Groh et al. (2020)           | 116       | not applicable to this dataset                                    |
| Groh et al. (2020)           | 123       | considerable ontogenetic and intraspecific variation in character |
| Groh et al. (2020)           | 130       | not applicable to this dataset                                    |
| Groh et al. (2020)           | 138       | similar to character 159 in this dataset                          |
| Groh et al. (2020)           | 143       | similar to character 179 in this dataset                          |
| Groh et al. (2020)           | 158       | similar to character 60 in this dataset                           |
| Groh et al. (2020)           | 163       | anatomically invalid character                                    |
| Groh et al. (2020)           | 261       | anatomically invalid character                                    |
| Groh et al. (2020)           | 291       | not applicable to this dataset                                    |
| Groh et al. (2020)           | 295       | not applicable to this dataset                                    |
| Groh et al. (2020)           | 362       | not applicable to this dataset                                    |
| Groh et al. (2020)           | 381       | ontogenetically variable                                          |
| Groh et al. (2020)           | 384       | all taxa scored the same in this dataset                          |
| Groh et al. (2020)           | 414       | character 155 in this dataset                                     |
| Groh et al. (2020)           | 423       | not applicable to this dataset                                    |
| Iijima and Kobayashi (2019)  | 245       | no variation in taxa                                              |
| Salas-Gismondi et al. (2019) | 207       | similar to character 14 in this dataset                           |
| Salas-Gismondi et al. (2019) | 208       | similar to character 11 in this dataset                           |
| Salas-Gismondi et al. (2019) | 209       | similar to character 9 in this dataset                            |
| Lee and Yates (2018)         | 1         | anatomically invalid character                                    |
| Lee and Yates (2018)         | 6         | no variation in taxa                                              |
| Lee and Yates (2018)         | 13        | redundant with character 143 in this dataset                      |
| Lee and Yates (2018)         | 15        | scores do not match observations                                  |
| Lee and Yates (2018)         | 17        | scores do not match observations                                  |
| Lee and Yates (2018)         | 32        | no variation in taxa                                              |
| Lee and Yates (2018)         | 35        | anatomically invalid character                                    |
| Lee and Yates (2018)         | 47        | anatomically invalid character                                    |

Table 1: Rejected characters

| Study                        | Character | Reason for rejection                                        |
|------------------------------|-----------|-------------------------------------------------------------|
| Lee and Yates (2018)         | 54        | no variation in taxa                                        |
| Lee and Yates (2018)         | 62        | no variation in taxa                                        |
| Lee and Yates (2018)         | 73        | redundant with character 84 in this dataset                 |
| Lee and Yates (2018)         | 82        | varies intraspecifically                                    |
| Lee and Yates (2018)         | 83        | similar to character 84 in this dataset                     |
| Lee and Yates (2018)         | 84        | no variation in taxa                                        |
| Lee and Yates (2018)         | 85        | no variation in taxa                                        |
| Lee and Yates (2018)         | 86        | no variation in taxa                                        |
| Lee and Yates (2018)         | 89        | no variation in taxa                                        |
| Lee and Yates (2018)         | 93        | no variation in taxa                                        |
| Lee and Yates (2018)         | 94        | redundant with character 8 in this dataset                  |
| Lee and Yates (2018)         | 102       | no variation in taxa                                        |
| Lee and Yates (2018)         | 113       | variable within species ontogenetically                     |
| Lee and Yates (2018)         | 114       | variable within species ontogenetically                     |
| Lee and Yates (2018)         | 116       | no variation in taxa                                        |
| Lee and Yates (2018)         | 141       | varies intraspecifically                                    |
| Lee and Yates (2018)         | 148       | similar to character 171 in this dataset                    |
| Lee and Yates (2018)         | 149       | similar to character 172 in this dataset                    |
| Lee and Yates (2018)         | 153       | no variation in taxa                                        |
| Lee and Yates (2018)         | 170       | autapomorphy of <i>Crocodylus johnstoni</i> in this dataset |
| Lee and Yates (2018)         | 172       | no variation in taxa                                        |
| Lee and Yates (2018)         | 177       | no variation in taxa                                        |
| Lee and Yates (2018)         | 178       | similar to character 151 in this dataset                    |
| Lee and Yates (2018)         | 179       | no variation in taxa                                        |
| Lee and Yates (2018)         | 181       | no variation in taxa                                        |
| Lee and Yates (2018)         | 183       | varies intraspecifically                                    |
| Lee and Yates (2018)         | 189       | no variation in taxa                                        |
| Lee and Yates (2018)         | 193       | no variation in taxa                                        |
| Lee and Yates (2018)         | 200       | no variation in taxa                                        |
| Lee and Yates (2018)         | 218       | no variation in taxa                                        |
| Lee and Yates (2018)         | 219       | not practical to score                                      |
| Lee and Yates (2018)         | 237       | no variation in taxa                                        |
| Lee and Yates (2018)         | 262       | character 321 in this dataset                               |
| Lee and Yates (2018)         | 277       | character 317 in this dataset                               |
| Cidade et al. (2017)         | 187       | no variation in taxa                                        |
| Jouve (2016)                 | 140       | similar to character 9 in this dataset                      |
| Jouve (2016)                 | 211       | no variation in taxa                                        |
| Jouve (2016)                 | 241       | similar to character 126 in this dataset                    |
| Salas-Gismondi et al. (2016) | 202       | no variation in taxa                                        |
| Salas-Gismondi et al. (2016) | 206       | similar to character 72 in this dataset                     |

Table 1: Rejected characters

| Study                        | Character | Reason for rejection                                                  |
|------------------------------|-----------|-----------------------------------------------------------------------|
| Jouve et al. (2015)          | 203       | similar to character 147 in this dataset                              |
| Jouve et al. (2015)          | 205       | similar to character 46 in this dataset                               |
| Jouve et al. (2015)          | 226       | varies intraspecifically                                              |
| Jouve et al. (2015)          | 227       | similar to character 147 in this dataset                              |
| Jouve et al. (2015)          | 238       | similar to character 13 in this dataset                               |
| Salas-Gismondi et al. (2015) | 199       | no variation in taxa                                                  |
| Brochu and Storrs (2012)     | 189       | no variation in taxa                                                  |
| Brochu and Storrs (2012)     | 182       | all taxa scored as “?”                                                |
| Brochu (2011)                | 106       | similar to character 147 here                                         |
| Brochu (2011)                | 20        | no variation in taxa                                                  |
| Brochu (2011)                | 179       | no variation in taxa                                                  |
| Buscalioni et al. (2011)     | 181       | no variation in taxa                                                  |
| Buscalioni et al. (2011)     | 182       | no variation in taxa                                                  |
| Buscalioni et al. (2011)     | 183       | similar to character 13 in this dataset                               |
| Jouve et al. (2008)          | 170       | similar to character 2 in this dataset                                |
| Jouve et al. (2008)          | 185       | no variation in taxa                                                  |
| Jouve et al. (2008)          | 187       | similar to character 16 in this dataset                               |
| Jouve et al. (2008)          | 192       | similar to character 50 in this dataset                               |
| Jouve et al. (2008)          | 193       | similar to character 50 in this dataset                               |
| Jouve et al. (2008)          | 194       | considered impractical to score                                       |
| Ösi et al. (2007)            | 166       | autapomorphy of <i>Iharkutosuchus makadii</i>                         |
| Ösi et al. (2007)            | 167       | no variation in taxa                                                  |
| Ösi et al. (2007)            | 169       | no variation in taxa                                                  |
| Salisbury et al. (2006)      | 169       | no variation in taxa                                                  |
| Salisbury et al. (2006)      | 172       | similar to characters 188 and 189 here                                |
| Salisbury et al. (2006)      | 173       | autapomorphy of <i>Isisfordia duncani</i> in this dataset             |
| Ortega et al. (2000)         | 115       | no variation in taxa                                                  |
| Ortega et al. (2000)         | 161       | no variation in taxa                                                  |
| Brochu (1999)                | 1         | no variation in taxa                                                  |
| Brochu (1999)                | 2         | no variation in taxa                                                  |
| Brochu (1999)                | 56        | anatomically invalid character (see character list)                   |
| Brochu (1999)                | 60        | no variation in taxa                                                  |
| Brochu (1999)                | 125       | uninformative as state 1 is autapomorphy of <i>Melanosuchus niger</i> |
| Brochu (1999)                | 160       | uninformative state 1 is autapomorphy of <i>Gavialis gangeticus</i>   |
| Brochu (1999)                | 161       | similar to character 3 here                                           |
| Brochu (1999)                | 163       | no variation in taxa                                                  |
| Brochu (1999)                | 164       | no variation in taxa                                                  |

Table 1: Rejected characters

| Study                   | Character | Reason for rejection |
|-------------------------|-----------|----------------------|
| Norell and Clark (1990) | 2         | no variation in taxa |
| Norell and Clark (1990) | 3         | no variation in taxa |
