# Supplementary material for: Phylogenetic analysis of a new morphological dataset elucidates the evolutionary history of Crocodylia and resolves the long-standing gharial problem
Source: PeerJ journal article supplement (doi:10.7717/peerj.12094), 2021-09-06
Supplement: TableS2_Taxon_age_ranges.pdf [file TableS2_Taxon_age_ranges.pdf]

Table 1: First and last appearance dates used in measures of stratigraphic congruence.

| Taxon                              | FAD   | LAD   |
|------------------------------------|-------|-------|
| <i>Acresuchus pachytemporalis</i>  | 11.62 | 5.333 |
| <i>Acynodon iberoccitanus</i>      | 77.9  | 66    |
| <i>Agaresuchus fontisensis</i>     | 77.9  | 69    |
| <i>Aktiogavialis caribesi</i>      | 11.6  | 7.2   |
| <i>Alligator mcgrewi</i>           | 20.43 | 15.97 |
| <i>Alligator mefferdi</i>          | 13.8  | 10.3  |
| <i>Alligator mississippiensis</i>  | 10.3  | 0     |
| <i>Alligator olseni</i>            | 20.4  | 16    |
| <i>Alligator prenasalis</i>        | 37.2  | 33.9  |
| <i>Alligator sinensis</i>          | 3.6   | 0     |
| <i>Allodaposuchus precedens</i>    | 77.9  | 66    |
| <i>Allognathosuchus polyodon</i>   | 50.3  | 47.8  |
| <i>Allognathosuchus wartheni</i>   | 56    | 50.3  |
| <i>Arambourgia gaudryi</i>         | 37.8  | 33.9  |
| <i>Argochampsia krebsi</i>         | 66    | 56    |
| <i>Asiatosuchus depressifrons</i>  | 56    | 47.8  |
| <i>Asiatosuchus germanicus</i>     | 47.8  | 41.2  |
| <i>Asiatosuchus nanlingensis</i>   | 61.6  | 59.2  |
| <i>Australosuchus clarkae</i>      | 28.1  | 16    |
| <i>Baru darrowi</i>                | 16    | 11.6  |
| <i>Baru huberi</i>                 | 28.1  | 23    |
| <i>Baru wickeni</i>                | 28.1  | 23    |
| <i>Bernissartia fagesii</i>        | 129.4 | 125   |
| <i>Borealosuchus acutidentatus</i> | 66    | 63.3  |
| <i>Borealosuchus formidabilis</i>  | 61.6  | 59.2  |
| <i>Borealosuchus sternbergii</i>   | 70.6  | 63.3  |
| <i>Borealosuchus threensis</i>     | 70.6  | 61.7  |
| <i>Borealosuchus wilsoni</i>       | 56    | 47.8  |
| <i>Bottosaurus harlani</i>         | 70.6  | 66    |
| <i>Boverisuchus magnifrons</i>     | 47.8  | 41.2  |
| <i>Boverisuchus vorax</i>          | 50.3  | 47.8  |
| <i>Brachychampsia montana</i>      | 72.1  | 66    |
| <i>Brochuchus pigotti</i>          | 20.4  | 16    |
| <i>Caiman brevirostris</i>         | 11.6  | 5.3   |
| <i>Caiman crocodilus</i>           | 2.58  | 0     |
| <i>Caiman gasparinae</i>           | 11.6  | 7.2   |
| <i>Caiman latirostris</i>          | 9     | 0     |
| <i>Caiman lutescens</i>            | 11.6  | 7.2   |
| <i>Caiman wannlangstoni</i>        | 16    | 5.3   |
| <i>Caiman yacare</i>               | 11.6  | 0     |
| <i>Ceratosuchus burdoschi</i>      | 56.8  | 56    |
| <i>Crocodylus acutus</i>           | 2.6   | 0.1   |

| Taxon                                                            | FAD   | LAD   |
|------------------------------------------------------------------|-------|-------|
| ' <i>Crocodylus</i> ' <i>affinis</i>                             | 50.3  | 47.8  |
| <i>Crocodylus anthropophagus</i>                                 | 1.8   | 0.01  |
| <i>Crocodylus intermedius</i>                                    | 0.1   | 0     |
| <i>Crocodylus johnstoni</i>                                      | 2.6   | 0     |
| ' <i>Crocodylus</i> ' <i>megarhinus</i>                          | 33.9  | 28.1  |
| <i>Crocodylus mindorensis</i>                                    | 0.1   | 0     |
| <i>Crocodylus moreletii</i>                                      | 0.1   | 0     |
| <i>Crocodylus niloticus</i>                                      | 11.6  | 0     |
| <i>Crocodylus novaeguineae</i>                                   | 0.1   | 0     |
| <i>Crocodylus palaeindicus</i>                                   | 11.6  | 2.6   |
| <i>Crocodylus palustris</i>                                      | 0.1   | 0.01  |
| <i>Crocodylus porosus</i>                                        | 5.3   | 0     |
| <i>Crocodylus rhombifer</i>                                      | 2.6   | 0     |
| <i>Crocodylus siamensis</i>                                      | 2.6   | 0.8   |
| <i>Crocodylus thorbjarnarsoni</i>                                | 5.3   | 1.8   |
| <i>Caiman</i> cf. <i>lutescens</i> , ('La Venta <i>Caiman</i> ') | 11.6  | 7.2   |
| <i>Dadagavialis gunai</i>                                        | 23.03 | 15.97 |
| <i>Diplocynodon darwini</i>                                      | 47.8  | 41.2  |
| <i>Diplocynodon deponiae</i>                                     | 47.8  | 41.2  |
| <i>Diplocynodon hantoniensis</i>                                 | 37.8  | 33.9  |
| <i>Diplocynodon muelleri</i>                                     | 33.9  | 28.1  |
| <i>Diplocynodon ratelii</i>                                      | 23    | 13.8  |
| <i>Diplocynodon remensis</i>                                     | 59.2  | 56    |
| <i>Diplocynodon tormis</i>                                       | 41.2  | 37.8  |
| <i>Dollosuchoides densmorei</i>                                  | 47.8  | 41.2  |
| <i>Eocaiman cavernensis</i>                                      | 47.8  | 37.8  |
| <i>Eocaiman palaeocenicus</i>                                    | 66    | 61.6  |
| <i>Eogavialis africanum</i>                                      | 38    | 28.4  |
| <i>Eosuchus lerichei</i>                                         | 58.7  | 55.8  |
| <i>Eosuchus minor</i>                                            | 59.2  | 47.8  |
| <i>Eothoracosaurus mississippiensis</i>                          | 72.6  | 66    |
| <i>Euthecodon arambourgi</i>                                     | 23    | 16    |
| <i>Gavialis browni</i>                                           | 11.6  | 5.3   |
| <i>Gavialis gangeticus</i>                                       | 2.6   | 0     |
| <i>Gavialis lewisi</i>                                           | 5.3   | 2.6   |
| <i>Gavialosuchus eggenburgensis</i>                              | 20.4  | 16    |
| Glen Rose form                                                   | 125   | 100.5 |
| <i>Globidentosuchus brachyrostris</i>                            | 11.6  | 5.3   |
| <i>Gnatusuchus pebasensis</i>                                    | 16    | 11.6  |
| <i>Gryposuchus colombianus</i>                                   | 16    | 11.6  |
| <i>Gryposuchus croizati</i>                                      | 11.6  | 5.3   |
| <i>Gryposuchus neogaeus</i>                                      | 11.6  | 7.2   |
| <i>Gryposuchus pachakamue</i>                                    | 16    | 11.6  |
| <i>Hassiacosuchus haupti</i>                                     | 47.8  | 41.2  |
| <i>Hylaeochampsia vectiana</i>                                   | 127.2 | 125   |

| Taxon                                 | FAD   | LAD   |
|---------------------------------------|-------|-------|
| <i>Iharkutosuchus makadii</i>         | 86.3  | 83.6  |
| <i>Ikanogavialis gameroi</i>          | 11.6  | 6.8   |
| <i>Isisfordia duncani</i>             | 106.8 | 97.2  |
| <i>Jiangxisuchus nankangensis</i>     | 70.6  | 66    |
| <i>Kambara implexidens</i>            | 56    | 47.8  |
| <i>Kambara murgonensis</i>            | 56    | 47.8  |
| <i>Kambara taraina</i>                | 47.8  | 33.9  |
| <i>Kentisuchus spenceri</i>           | 55.8  | 48.6  |
| <i>Kuttanacaiman iquitosensis</i>     | 16    | 11.6  |
| <i>Leidyosuchus canadensis</i>        | 77.9  | 72.1  |
| <i>Lohuecosuchus megadontos</i>       | 77.9  | 69    |
| <i>Maomingosuchus petrolica</i>       | 37.8  | 33.9  |
| <i>Marccosuchus zennaroi</i>          | 55.8  | 48.6  |
| <i>Mecistops cataphractus</i>         | 11.6  | 0     |
| <i>Mekosuchus inexpectatus</i>        | 0.01  | 0     |
| <i>Mekosuchus sanderi</i>             | 16    | 11.6  |
| <i>Mekosuchus whitehunterensis</i>    | 28.1  | 23    |
| <i>Melanosuchus niger</i>             | 0.1   | 0     |
| <i>Mourasuchus amazonensis</i>        | 11.6  | 7.2   |
| <i>Mourasuchus arendsi</i>            | 11.6  | 5.3   |
| <i>Mourasuchus atopus</i>             | 16    | 5.3   |
| <i>Navajosuchus mooki</i>             | 66    | 61.6  |
| <i>Necrosuchus ionensis</i>           | 61.6  | 59.2  |
| <i>Osteolaemus tetraspis</i>          | 11.6  | 0     |
| <i>Paleosuchus palpebrosus</i>        | 0.1   | 0     |
| <i>Paleosuchus trigonatus</i>         | 0.1   | 0     |
| <i>Paratomistoma courti</i>           | 41.3  | 38    |
| <i>Penghusuchus pani</i>              | 11.5  | 5.3   |
| <i>Piscogavialis jugaliperforatus</i> | 11.6  | 5.3   |
| <i>Planocrania datangensis</i>        | 61.6  | 59.2  |
| <i>Planocrania hengdongensis</i>      | 59.2  | 56    |
| <i>Portugalosuchus azenhae</i>        | 99.7  | 94.3  |
| <i>Procaimanoidea utahensis</i>       | 46.2  | 41.2  |
| <i>Protocaiman peligrensis</i>        | 66    | 61.6  |
| <i>Purussaurus barasiliensis</i>      | 11.6  | 7.2   |
| <i>Purussaurus mirandai</i>           | 11.6  | 5.3   |
| <i>Purussaurus neivensis</i>          | 16    | 5.3   |
| <i>Quinkana</i>                       | 28.1  | 0.01  |
| <i>Shamosuchus djadochtaensis</i>     | 83.6  | 72.1  |
| <i>Siquisiquesuchus venezuelensis</i> | 20.4  | 16    |
| <i>Stangerochampsia mccabei</i>       | 70.6  | 66    |
| <i>Thecachampsia antiquus</i>         | 13.8  | 5.3   |
| <i>Thecachampsia sericodon</i>        | 15.97 | 11.6  |
| <i>Theriosuchus pusillus</i>          | 145.5 | 140.2 |
| <i>Thoracosaurus isorhynchus</i>      | 70.6  | 61.6  |

| Taxon                                | FAD  | LAD  |
|--------------------------------------|------|------|
| <i>Thoracosaurus neocesariensis</i>  | 70.6 | 61.7 |
| <i>Tomistoma cairense</i>            | 47.8 | 41.2 |
| <i>Tomistoma dowsoni</i>             | 23   | 16   |
| <i>Tomistoma lusitanica</i>          | 20.4 | 7.2  |
| <i>Tomistoma schlegelii</i>          | 0.1  | 0    |
| <i>Toyotamaphimeia machikanensis</i> | 0.8  | 0.1  |
| <i>Trilophosuchus rackhami</i>       | 16   | 11.6 |
| <i>Tsoabichi greenriverensis</i>     | 56   | 47.8 |
| <i>Ultrastenos willisi</i>           | 28.1 | 23   |
| <i>Voay robustus</i>                 | 0.1  | 0.01 |
| <i>Wannaganosuchus brachymanus</i>   | 61.6 | 56   |
| <i>Wannchampsus kirpachi</i>         | 119  | 113  |
