# Supplementary material for: Phylogenetic analysis of a new morphological dataset elucidates the evolutionary history of Crocodylia and resolves the long-standing gharial problem
Source: PeerJ journal article supplement (doi:10.7717/peerj.12094), 2021-09-06
Supplement: TableS3_constrained_searches.pdf [file TableS3_constrained_searches.pdf]

Table 1: Summary of constrained analyses.

| Constraint                                                                                                                                                                                                                                       | MPTs | Tree length | Tree length increase | Templeton test |
|--------------------------------------------------------------------------------------------------------------------------------------------------------------------------------------------------------------------------------------------------|------|-------------|----------------------|----------------|
| (1) <i>Diplocynodon</i> monophyletic                                                                                                                                                                                                             | 3    | 8282.499    | 100.643              | insignificant  |
| (2) <i>Eocaiman</i> forced into Caimaninae                                                                                                                                                                                                       | 3    | 8190.625    | 8.769                | insignificant  |
| (3) <i>Eocaiman</i> forced into clade of South American caimanines                                                                                                                                                                               | 3    | 8254.124    | 72.269               | insignificant  |
| (4) Extant Jacareans (sensu Norell, 1988) monophyletic, with the following floating taxa: <i>Caiman wannlangstoni</i> , <i>Caiman brevirostris</i> , UCMP 39978, <i>Acresuchus pachytemporalis</i> , <i>Purussaurus</i> , and <i>Necrosuchus</i> | 3    | 8182.617    | 0.761                | insignificant  |
| (5) Force <i>Portugalosuchus</i> out of Crocodylia, ‘thoracosaur’ float                                                                                                                                                                          | 9    | 8829.43595  | 47.58                | insignificant  |
| (6) Force “Brevirostres”, i.e. Alligatorioidea + “Crocodyloidea”                                                                                                                                                                                 | 3    | 8187.359    | 5.503                | significant    |
| (7) ‘Thoracosaur’ forced out of Crocodylia. <i>Portugalosuchus</i> , planocraniids, and <i>Borealosuchus</i> float                                                                                                                               | 3    | 8373.965    | 192.110              | significant    |
| (8) ‘Thoracosaur’ forced out of Gavialidae ( <i>Gavialis</i> + <i>Tomistoma</i> ), all non-thoracosaurine gavialoids float                                                                                                                       | 3    | 8184.082    | 2.226                | insignificant  |
| (9) ‘Thoracosaur’ forced out of Crocodylia ( <i>Argochampsa</i> , <i>Eogavialis</i> , <i>Portugalosuchus</i> , planocraniids, <i>Borealosuchus</i> float)                                                                                        | 9    | 8286.94     | 105.085              | significant    |
| (10) <i>Asiatosuchus germanicus</i> , <i>Asiatosuchus depressifrons</i> , and ‘ <i>Crocodylus</i> ’ <i>affinis</i> forced out of Longirostres, <i>Jiangxisuchus</i> floats                                                                       | 3    | 8188.548    | 6.692                | insignificant  |
| (11) Monophyletic mekosuchinae forced outside of Longirostres, <i>Quinkana</i> , <i>Australosuchus</i> and <i>Asiatosuchus nanlingensis</i> float in Mekosuchinae and Crocodyloidea                                                              | 3    | 8198.052    | 16.196               | insignificant  |
| (12) Force <i>Asiatosuchus nanlingensis</i> forced out of Mekosuchinae. <i>Australosuchus</i> and <i>Quinkana</i> float                                                                                                                          | 3    | 8202.683    | 20.827               | insignificant  |
| (13) <i>Quinkana</i> and <i>Australosuchus</i> forced in Mekosuchinae, <i>Asiatosuchus nanlingensis</i> floats                                                                                                                                   | 3    | 8204.086    | 22.230               | significant    |
| (14) <i>Mecistops</i> forced into monophyletic Osteolaeminae                                                                                                                                                                                     | 3    | 8201.109    | 19.254               | insignificant  |
