# Supplementary material for: Phylogenetic analysis of a new morphological dataset elucidates the evolutionary history of Crocodylia and resolves the long-standing gharial problem
Source: PeerJ journal article supplement (doi:10.7717/peerj.12094), 2021-09-06
Supplement: TableS4_gavialoid_synapomorphies.pdf [file TableS4_gavialoid_synapomorphies.pdf]

| Character | Node/Clade                                    | Longirostrine character? | Synapomorphy type |                           |                              |                                  |                |                          |                     |                        |                     |  |  |
|-----------|-----------------------------------------------|--------------------------|-------------------|---------------------------|------------------------------|----------------------------------|----------------|--------------------------|---------------------|------------------------|---------------------|--|--|
|           |                                               |                          |                   | Thoracosaurus isorhynchus | Thoracosaurus neocesariensis | Eothoracosaurus mississippiensis | Eosuchus minor | Portugalosuchus lerichei | Eogavialis azenahae | Argochampsia africanum | Argochampsia krebsi |  |  |
| 107-1     | Gavialoidea                                   | No                       | Exclusive         | 1                         | 1                            | 1                                | 1              | 0                        | 0                   | 1                      | ?                   |  |  |
| 136-1     | Gavialoidea                                   | No                       | Ambiguous         | 0                         | ?                            | 0                                | 0              | 0                        | 0                   | 1                      | 1                   |  |  |
| 144-1     | Gavialoidea                                   | Yes                      | Ambiguous         | 1                         | ?                            | 0                                | 0              | 0                        | ?                   | 1                      | 1                   |  |  |
| 151-2     | Gavialoidea                                   | Yes                      | Ambiguous         | 2                         | ?                            | 2                                | 2              | 2                        | ?                   | 2                      | 2                   |  |  |
| 154-0     | Gavialoidea                                   | No                       | Ambiguous         | 0                         | ?                            | 0                                | 0              | 0                        | ?                   | 0                      | 0                   |  |  |
| 183-1     | Gavialoidea                                   | No                       | Ambiguous         | ?                         | ?                            | ?                                | 0              | 0                        | ?                   | 0                      | ?                   |  |  |
| 191-0     | Gavialoidea                                   | No                       | Ambiguous         | 0                         | ?                            | ?                                | 0              | 0                        | ?                   | 0                      | 0                   |  |  |
| 206-0     | Gavialoidea                                   | No                       | Exclusive         | ?                         | 0                            | 0                                | 1              | 0                        | ?                   | 0                      | 0                   |  |  |
| 41-1      | Gavialoidea                                   | No                       | Ambiguous         | 1                         | 1                            | 1                                | 1              | 1                        | ?                   | 1                      | 1                   |  |  |
| 50-1      | Gavialoidea                                   | Yes                      | Ambiguous         | 1                         | 1                            | 1                                | 1              | 1                        | ?                   | 1                      | 1                   |  |  |
| 75-2      | Gavialoidea                                   | No                       | Ambiguous         | 0                         | 0                            | 0                                | 1              | 0                        | 0                   | 2                      | 1                   |  |  |
| 46-1      | <i>Maomingosuchus</i> + <i>Gavialis</i>       | Yes                      | Shared            | 1                         | ?                            | 1                                | 1              | 1                        | ?                   | 1                      | 1                   |  |  |
| 98-1      | <i>Maomingosuchus</i> + <i>Gavialis</i>       | No                       | Ambiguous         | 1                         | ?                            | ?                                | ?              | 0                        | 1                   | 1                      | ?                   |  |  |
| 220-0     | <i>Maomingosuchus</i> + <i>Gavialis</i>       | Yes                      | Ambiguous         | ?                         | ?                            | 0                                | 1              | 0                        | ?                   | 0                      | 0                   |  |  |
| 224-2     | <i>Maomingosuchus</i> + <i>Gavialis</i>       | Yes                      | Ambiguous         | ?                         | ?                            | 2                                | 2              | 2                        | ?                   | 3                      | ?                   |  |  |
| 219-3     | Gavialidae                                    | Yes                      | Ambiguous         | ?                         | ?                            | 3                                | 3              | 3                        | ?                   | 3                      | ?                   |  |  |
| 221-3     | Gavialidae                                    | Yes                      | Exclusive         | ?                         | ?                            | 3                                | 2              | ?                        | ?                   | 3                      | ?                   |  |  |
| 280-1     | Gavialidae                                    | No                       | Shared            | ?                         | ?                            | ?                                | ?              | ?                        | ?                   | ?                      | ?                   |  |  |
| 328-0     | Gavialidae                                    | No                       | Shared            | ?                         | ?                            | ?                                | ?              | ?                        | ?                   | ?                      | ?                   |  |  |
| 278-1     | <i>Toyotamaphimeia</i> + <i>Gavialis</i>      | No                       | Exclusive         | 1                         | 1                            | ?                                | 1              | 0                        | ?                   | 1                      | ?                   |  |  |
| 193-1     | <i>Toyotamaphimeia</i> + <i>Gavialis</i>      | No                       | Ambiguous         | 1                         | 1                            | 1                                | ?              | 0                        | 1                   | 0                      | 1                   |  |  |
| 247-0     | <i>Toyotamaphimeia</i> + <i>Gavialis</i>      | No                       | Ambiguous         | ?                         | ?                            | 0                                | 0              | ?                        | ?                   | 0                      | 1                   |  |  |
| 276-1     | <i>Toyotamaphimeia</i> + <i>Gavialis</i>      | No                       | Ambiguous         | 1                         | 1                            | ?                                | 1              | 1                        | ?                   | ?                      | 0                   |  |  |
| 288-0     | <i>Toyotamaphimeia</i> + <i>Gavialis</i>      | No                       | Exclusive         | ?                         | ?                            | ?                                | ?              | ?                        | ?                   | ?                      | ?                   |  |  |
| 307-0     | <i>Toyotamaphimeia</i> + <i>Gavialis</i>      | No                       | Ambiguous         | ?                         | ?                            | ?                                | 0              | ?                        | ?                   | 1                      | ?                   |  |  |
| 309-0     | <i>Toyotamaphimeia</i> + <i>Gavialis</i>      | No                       | Ambiguous         | ?                         | ?                            | ?                                | ?              | ?                        | ?                   | ?                      | ?                   |  |  |
| 325-0     | <i>Toyotamaphimeia</i> + <i>Gavialis</i>      | No                       | Shared            | 0                         | ?                            | ?                                | 0              | 0                        | ?                   | 0                      | 0                   |  |  |
| 327-0     | <i>Toyotamaphimeia</i> + <i>Gavialis</i>      | No                       | Ambiguous         | ?                         | ?                            | 0                                | 0              | 1                        | ?                   | 0                      | 1                   |  |  |
| 89-0      | <i>Toyotamaphimeia</i> + <i>Gavialis</i>      | No                       | Shared            | 0                         | ?                            | 0                                | 0              | 0                        | 0                   | 0                      | 0                   |  |  |
| 149-1     | <i>Penghusuchus</i> + <i>Gavialis</i>         | Yes                      | Shared            | 1                         | 1                            | 1                                | 1              | 1                        | ?                   | 1                      | 1                   |  |  |
| 253-1     | <i>Penghusuchus</i> + <i>Gavialis</i>         | No                       | Ambiguous         | ?                         | ?                            | 1                                | 1              | ?                        | ?                   | ?                      | ?                   |  |  |
| 302-0     | <i>Penghusuchus</i> + <i>Gavialis</i>         | No                       | Shared            | 0                         | 0                            | ?                                | 1              | ?                        | ?                   | ?                      | 0                   |  |  |
| 90-0      | ' <i>T.</i> <i>cairense</i> + <i>Gavialis</i> | No                       | Shared            | 0                         | ?                            | ?                                | 0              | 0                        | 0                   | 0                      | 1                   |  |  |
| 147-7     | ' <i>T.</i> <i>cairense</i> + <i>Gavialis</i> | Yes                      | Shared            | 7                         | ?                            | 7                                | 7              | 7                        | ?                   | 7                      | 7                   |  |  |
| 304-0     | ' <i>T.</i> <i>cairense</i> + <i>Gavialis</i> | No                       | Shared            | 0                         | 0                            | ?                                | ?              | ?                        | ?                   | ?                      | ?                   |  |  |

| Character | Node/Clade                               | Longirostrine character? |           | Synapomorphy type         |                              |                                  |                |                   |                         |                      |                     |
|-----------|------------------------------------------|--------------------------|-----------|---------------------------|------------------------------|----------------------------------|----------------|-------------------|-------------------------|----------------------|---------------------|
|           |                                          | Yes                      | No        | Thoracosaurus isorhynchus | Thoracosaurus neocesariensis | Eothoracosaurus mississippiensis | Eosuchus minor | Eosuchus lerichei | Portugalosuchus azenhae | Eogavialis africanum | Argochampsia krebsi |
| 63-1      | <i>Portugalosuchus</i> + <i>Gavialis</i> | No                       | Shared    | 0                         | ?                            | 1                                | 0              | 0                 | 1                       | ?                    | 0                   |
| 91-1      | <i>Portugalosuchus</i> + <i>Gavialis</i> | No                       | Shared    | 0                         | ?                            | ?                                | ?              | ?                 | 1                       | 1                    | 1                   |
| 94-1      | <i>Portugalosuchus</i> + <i>Gavialis</i> | No                       | Ambiguous | 1                         | ?                            | 1                                | 0              | 0                 | 1                       | 1                    | 1                   |
| 115-0     | <i>Portugalosuchus</i> + <i>Gavialis</i> | No                       | Shared    | ?                         | ?                            | 0                                | ?              | 1                 | ?                       | 0                    | 0                   |
| 158-1     | <i>Portugalosuchus</i> + <i>Gavialis</i> | Yes                      | Exclusive | 0                         | ?                            | 1                                | 1              | 0                 | ?                       | 1                    | 1                   |

Table 1: List of all synapomorphies for Gavialoidea and less inclusive clades that group 'thoracosauers' and *Portugalosuchus* with other gavialoids. Red cells highlight character states that contrast with most or all other members of the respective node. Grey cells highlight missing data. Nodes described as *taxon x* + *taxon y*, indicate the least inclusive clade defined by those taxa. Underlined rows are exclusive synapomorphies that are discussed in the main text.
